# Supplementary material for: Acetylcholinesterase in Biofouling Species: Characterization and Mode of Action of Cyanobacteria-Derived Antifouling Agents
Source: Toxins (Basel). 2015 Jul 24;7(8):2739–56. doi: 10.3390/toxins7082739 (PMC4549721; doi:10.3390/toxins7082739)
Supplement: Supplementary file 1 [file toxins-07-02739-s001.pdf]

## Supplementary Materials

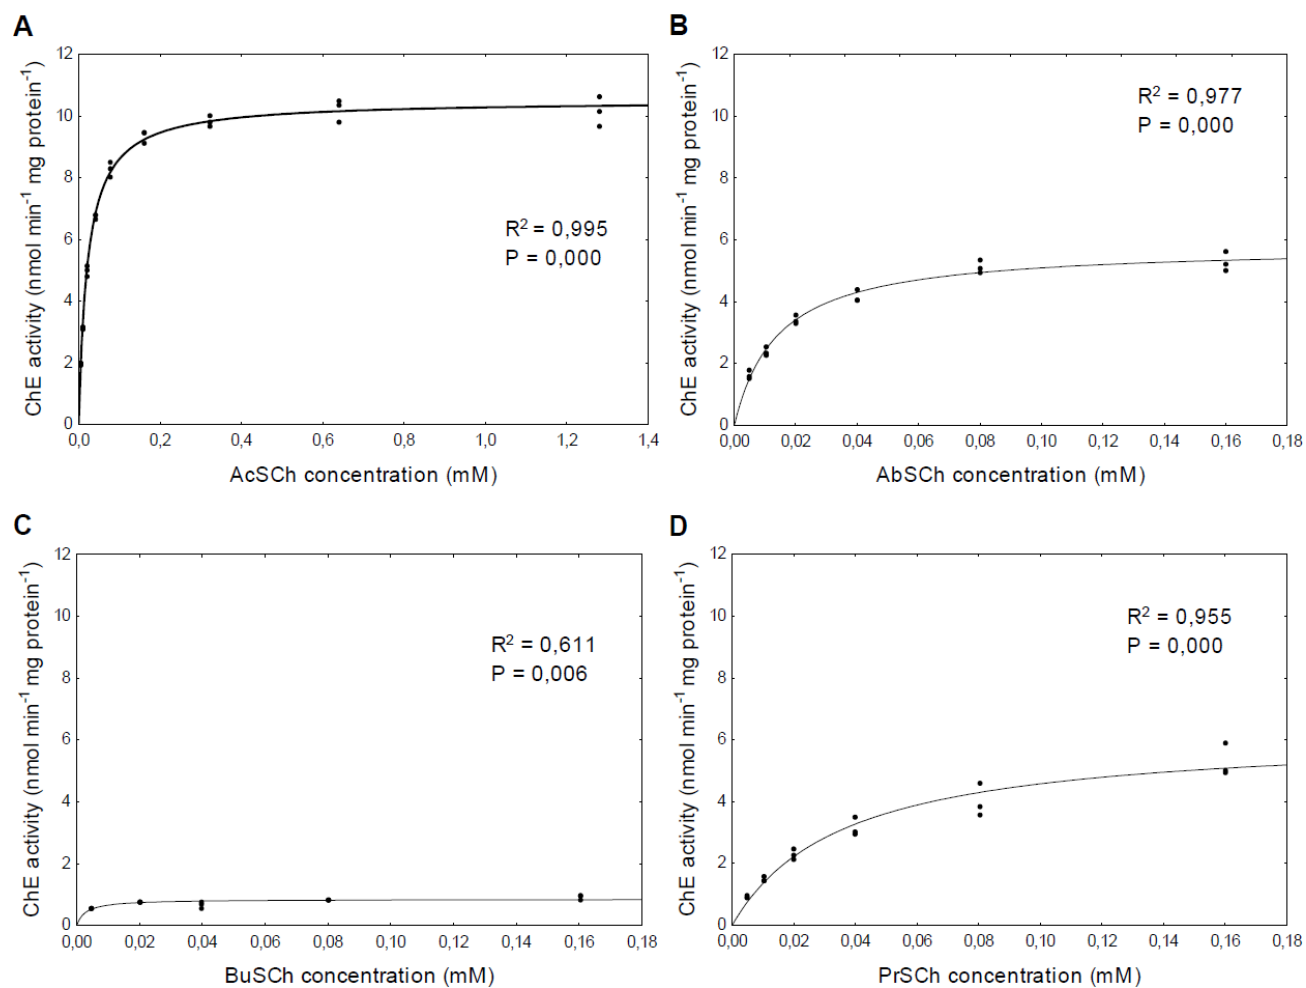

**Figure S1.** Hyperbolic regression of the specific ChE activity of *Mytilus galloprovincialis* foot on substrate concentration, for of the four substrates tested. (A): AcSch; (B): AbSch; (C): BuSch; (D): PrSch in foot homogenates.

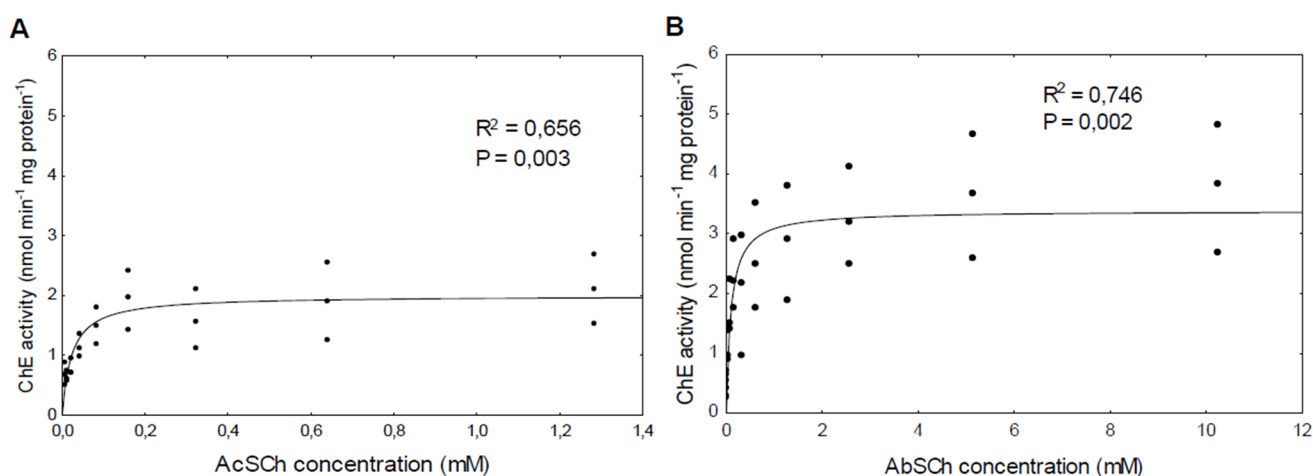

**Figure S2. Cont.**

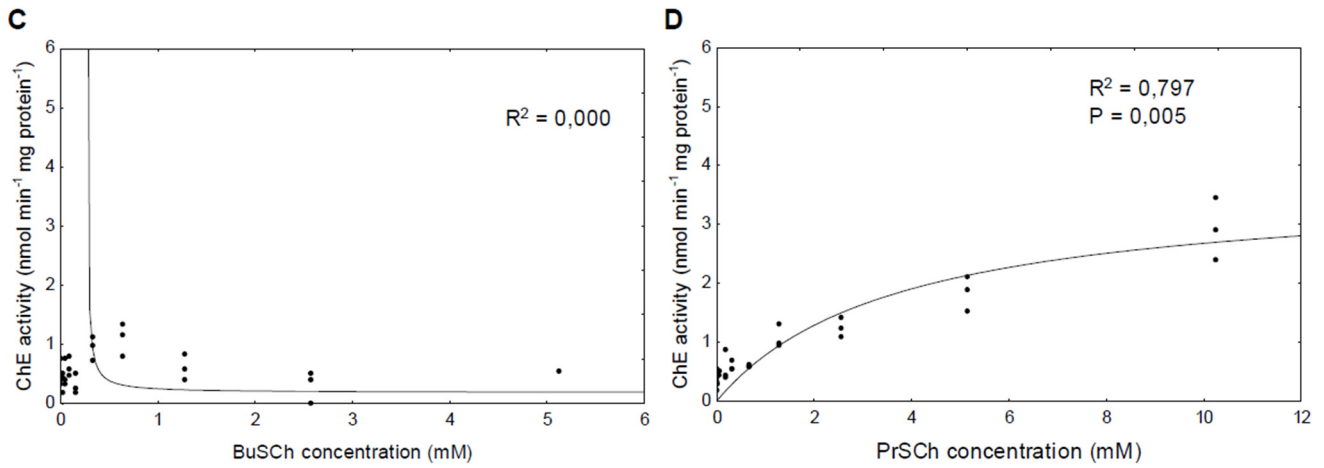

**Figure S2.** Hyperbolic regression of specific ChE activity of *Pollicipes pollicipes* capitulum soft tissues on substrate concentrations for each of the four substrates. (A): AcSch; (B): AbSch; (C): BuSch; (D): PrSch.

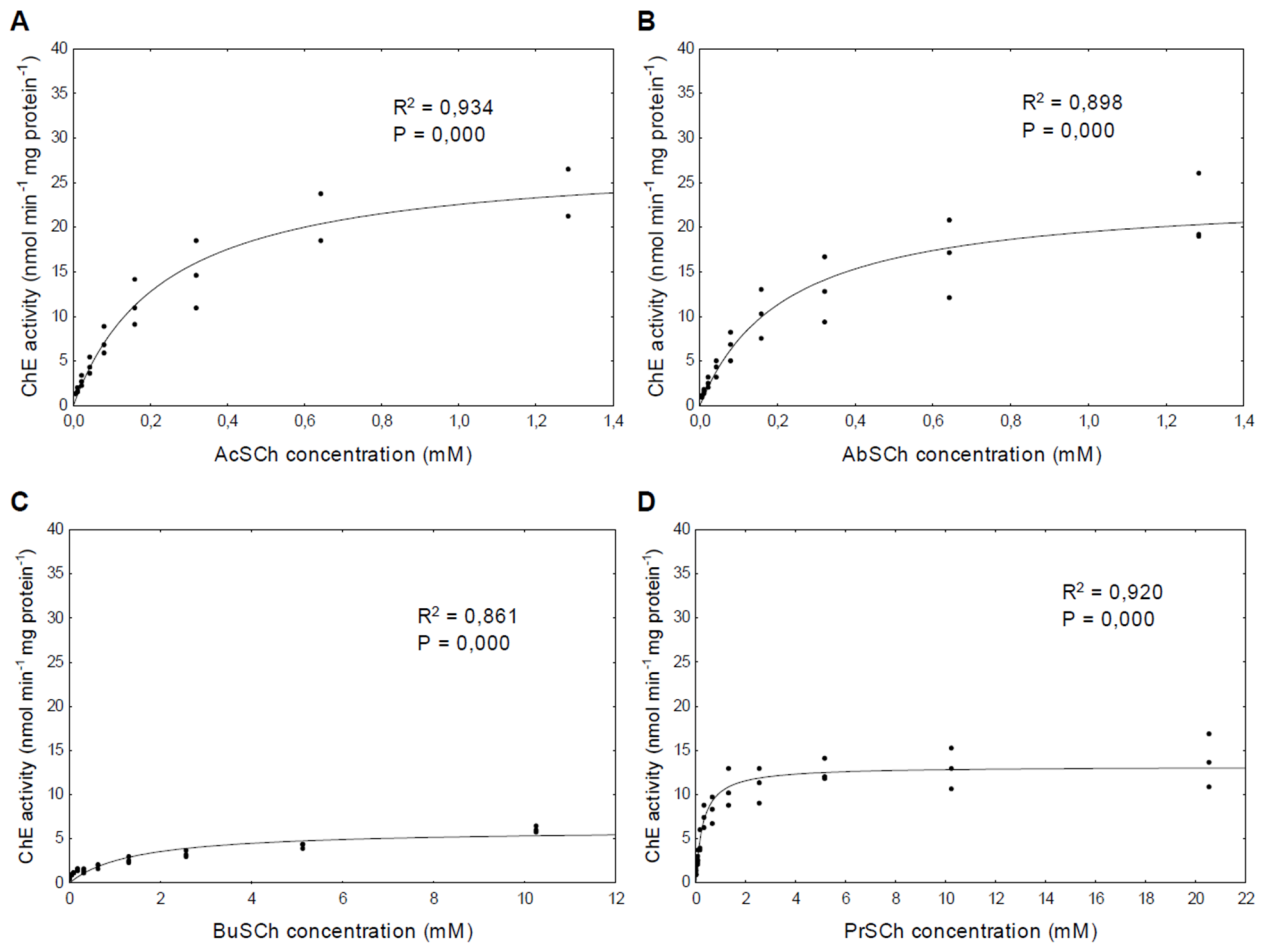

**Figure S3.** Hyperbolic regression of specific ChE activity of *Perforatus perforatus* soft tissues on substrate concentrations for each of the four substrates tested. (A): AcSch; (B): AbSch; (C): BuSch; (D): PrSch.
